# Supplementary material for: Airway Microbiota in Patients With Synchronous Multiple Primary Lung Cancer: The Bacterial Topography of the Respiratory Tract
Source: Front Oncol. 2022 Apr 12;12:811279. doi: 10.3389/fonc.2022.811279 (PMC9041701; doi:10.3389/fonc.2022.811279)
Supplement: Supplementary file 5 [file Table_3.xls]

## Sheet: biomarker (11)
genus	Mean(NT)	Variance(NT)	Std.err(NT)	Mean(T)	Variance(T)	Std.err(T)	P value	Q value
Succinivibrio	0	0	0	7.42787e-05	1.68183e-07	7.24964e-05	2.2923e-08	7.01445e-06
Legionella	2.78791e-05	2.48717e-08	2.78791e-05	0	0	0	4.91006e-08	7.51239e-06
Polynucleobacter	6.97208e-05	8.2224e-08	5.06902e-05	0	0	0	2.12155e-07	2.16399e-05
Marvinbryantia	0	0	0	5.51187e-05	3.06472e-08	3.09471e-05	1.25172e-06	9.57566e-05
Christensenella	0	0	0	4.92461e-05	3.82592e-08	3.45774e-05	9.34589e-06	0.000571968
Kingella	3.25888e-05	1.12396e-08	1.87413e-05	3.3236e-06	1.91331e-10	2.44522e-06	2.19697e-05	0.00112046
Murimonas	0	0	0	3.15402e-05	1.07224e-08	1.83051e-05	0.000138199	0.00140873
Ideonella	0	0	0	3.04904e-05	1.45503e-08	2.13237e-05	0.000534839	0.00140873
uncultured_bacterium_f_Acidobacteriaceae_Subgroup_1	0	0	0	0.000702085	1.36527e-06	0.000206554	0.000999001	0.00140873
Nordella	0	0	0	0.000342146	6.05099e-07	0.000137511	0.000999001	0.00140873
Novosphingobium	3.26832e-06	3.4182e-10	3.26832e-06	0.00164382	9.70554e-06	0.000550725	0.000999001	0.00140873
Occallatibacter	0	0	0	0.000447382	1.32733e-06	0.000203664	0.000999001	0.00140873
Ochrobactrum	0.000649025	9.61259e-06	0.000548081	0.00499302	4.61218e-05	0.00120054	0.000999001	0.00140873
Olsenella	0	0	0	0.00274786	2.48862e-05	0.000881869	0.000999001	0.00140873
Ornatilinea	0	0	0	0.000462296	6.72898e-07	0.000145011	0.000999001	0.00140873
Oscillibacter	0	0	0	0.00223441	1.47997e-05	0.000680068	0.000999001	0.00140873
Paeniclostridium	0	0	0	0.00212434	3.32801e-05	0.00101981	0.000999001	0.00140873
Paludisphaera	0	0	0	0.000309851	1.81382e-06	0.000238079	0.000999001	0.00140873
Paraclostridium	0	0	0	0.000668778	2.99056e-06	0.000305704	0.000999001	0.00140873
Paracoccus	2.39333e-05	1.83296e-08	2.39333e-05	0.00185496	4.97948e-06	0.000394473	0.000999001	0.00140873
Paraeggerthella	0	0	0	0.000174028	1.23169e-07	6.20406e-05	0.000999001	0.00140873
Parascardovia	0	0	0	0.000417281	1.73692e-06	0.000232978	0.000999001	0.00140873
Parasutterella	0	0	0	0.000228177	7.9915e-07	0.00015803	0.000999001	0.00140873
Parvimonas	0.00206429	7.53674e-05	0.00153468	0.0230583	0.000428307	0.0036585	0.000999001	0.00140873
Pedobacter	0.00106758	3.64711e-05	0.00106758	0	0	0	0.000999001	0.00140873
Pedomicrobium	0	0	0	0.000501795	1.79772e-06	0.00023702	0.000999001	0.00140873
Pelolinea	0	0	0	0.000514439	3.84945e-06	0.000346836	0.000999001	0.00140873
Pelomonas	0.0132802	0.000874945	0.00522896	5.59058e-05	3.83901e-08	3.46366e-05	0.000999001	0.00140873
Peptoanaerobacter	0	0	0	0.00127595	1.56873e-06	0.000221411	0.000999001	0.00140873
Peptoniphilus	0	0	0	0.000204402	2.1339e-07	8.16604e-05	0.000999001	0.00140873
Peptostreptococcus	0.000852214	3.08413e-06	0.00031045	0.0396088	0.00258898	0.00899475	0.000999001	0.00140873
Phaeobacter	0	0	0	0.00150276	8.55377e-06	0.000517016	0.000999001	0.00140873
Nocardioides	0	0	0	0.000329878	1.12416e-06	0.00018743	0.000999001	0.00140873
Nitrospirillum	0	0	0	0.000548284	1.3036e-06	0.000201835	0.000999001	0.00140873
Nesterenkonia	0	0	0	0.000303322	6.56952e-07	0.000143282	0.000999001	0.00140873
Mycobacterium	0	0	0	0.0141195	0.000437265	0.00369656	0.000999001	0.00140873
Lachnospira	2.53813e-05	2.06147e-08	2.53813e-05	0.00109423	2.74159e-06	0.000292703	0.000999001	0.00140873
Lachnotalea	0	0	0	0.000250311	1.74722e-06	0.000233668	0.000999001	0.00140873
Lactococcus	0	0	0	0.000120808	7.40229e-08	4.80959e-05	0.000999001	0.00140873
Lactonifactor	0	0	0	0.00184288	2.37828e-05	0.000862098	0.000999001	0.00140873
uncultured_bacterium_f_Ruminococcaceae	0.00128843	2.68304e-05	0.000915668	0.0173291	0.00163267	0.00714289	0.000999001	0.00140873
Lentimicrobium	0	0	0	0.000419066	5.61972e-06	0.000419066	0.000999001	0.00140873
Leptolinea	0	0	0	0.000180543	3.51545e-07	0.000104813	0.000999001	0.00140873
Leptotrichia	0.0200291	0.000590741	0.00429659	0.0904427	0.0195736	0.0247321	0.000999001	0.00140873
Leucobacter	0	0	0	0.000602643	5.68069e-06	0.000421333	0.000999001	0.00140873
Longilinea	0	0	0	0.000133347	3.99288e-07	0.000111704	0.000999001	0.00140873
Lutimaribacter	0	0	0	0.00357052	5.13951e-05	0.00126732	0.000999001	0.00140873
Marmoricola	0	0	0	0.000323802	4.98239e-07	0.00012478	0.000999001	0.00140873
uncultured_bacterium_f_Rhodobacteraceae	0	0	0	0.000268129	2.07889e-06	0.000254883	0.000999001	0.00140873
Megamonas	0	0	0	0.000244446	2.63919e-07	9.08155e-05	0.000999001	0.00140873
Megasphaera	0.00794106	0.000178466	0.00236158	0.000117577	2.35161e-08	2.71087e-05	0.000999001	0.00140873
Mesorhizobium	0	0	0	0.00240754	1.12232e-05	0.000592222	0.000999001	0.00140873
Methyloceanibacter	0	0	0	0.000331238	6.49211e-07	0.000142435	0.000999001	0.00140873
Methylorubrum	0	0	0	0.000341249	4.59933e-07	0.000119887	0.000999001	0.00140873
Methylosinus	0	0	0	0.000828185	4.62308e-06	0.000380094	0.000999001	0.00140873
Microbacterium	0	0	0	0.000822723	1.36073e-06	0.000206211	0.000999001	0.00140873
Micromonospora	0	0	0	0.000603247	1.65265e-06	0.000227256	0.000999001	0.00140873
Monoglobus	0	0	0	0.00306981	1.42559e-05	0.000667455	0.000999001	0.00140873
Muribaculum	0.016964	0.00164558	0.00717107	0.000102218	3.24945e-08	3.18662e-05	0.000999001	0.00140873
Phenylobacterium	0	0	0	0.000376115	4.24904e-07	0.000115231	0.000999001	0.00140873
uncultured_bacterium_f_Chitinophagaceae	0	0	0	8.86813e-05	2.24548e-07	8.37683e-05	0.000999001	0.00140873
uncultured_bacterium_f_Parachlamydiaceae	0.000264993	2.24708e-06	0.000264993	0	0	0	0.000999001	0.00140873
Prevotella	0.13231	0.0170548	0.023086	0.00098334	9.43978e-07	0.000171754	0.000999001	0.00140873
Sphingobium	0	0	0	0.000414674	3.45013e-06	0.000328354	0.000999001	0.00140873
Sphingomonas	0.00100383	8.45941e-06	0.000514156	0.00991447	0.000194625	0.00246618	0.000999001	0.00140873
Sporichthya	0	0	0	0.000362028	1.90655e-06	0.00024409	0.000999001	0.00140873
Sporobacter	7.72559e-05	1.90991e-07	7.72559e-05	0.00216137	1.26387e-05	0.000628459	0.000999001	0.00140873
Staphylococcus	0.0224644	0.00227067	0.00842369	7.84441e-05	3.7049e-08	3.40262e-05	0.000999001	0.00140873
Stappia	0	0	0	0.000225897	1.33048e-06	0.000203905	0.000999001	0.00140873
Stenotrophobacter	0	0	0	0.000721863	1.62611e-06	0.000225424	0.000999001	0.00140873
Streptobacillus	3.68933e-05	4.35557e-08	3.68933e-05	0.000856235	4.37113e-06	0.000369591	0.000999001	0.00140873
Streptococcus	0.0645402	0.00353573	0.0105115	0.00247238	8.30536e-06	0.000509453	0.000999001	0.00140873
Subdoligranulum	0	0	0	0.0029711	1.00084e-05	0.000559251	0.000999001	0.00140873
uncultured_bacterium_f_Clostridiales_Family_XIII._Incertae_Sedis	0	0	0	0.00139653	7.76775e-06	0.000492689	0.000999001	0.00140873
Soehngenia	0	0	0	0.000540359	8.77698e-06	0.000523718	0.000999001	0.00140873
Syntrophococcus	0.000107877	1.06075e-07	5.75747e-05	0.00189607	1.61824e-05	0.000711127	0.000999001	0.00140873
Tepidiphilus	0.000501468	3.57505e-06	0.000334246	0	0	0	0.000999001	0.00140873
Terrisporobacter	0	0	0	0.000803973	4.44839e-06	0.000372843	0.000999001	0.00140873
Thermanaerothrix	0	0	0	0.000277256	6.56086e-07	0.000143188	0.000999001	0.00140873
Thermomarinilinea	0	0	0	0.000498997	2.70865e-06	0.000290939	0.000999001	0.00140873
Thiothrix	0	0	0	0.000200827	6.58458e-07	0.000143446	0.000999001	0.00140873
Tissierella	0	0	0	0.000407257	3.65629e-06	0.000338022	0.000999001	0.00140873
Vallitalea	0	0	0	0.000928546	1.81378e-06	0.000238077	0.000999001	0.00140873
Veillonella	0.0866534	0.00761359	0.0154248	0.00217195	6.40987e-06	0.000447558	0.000999001	0.00140873
Wolbachia	0	0	0	0.000188141	2.96642e-07	9.62811e-05	0.000999001	0.00140873
uncultured_bacterium_c_Alphaproteobacteria	0	0	0	0.000310028	5.96557e-07	0.000136537	0.000999001	0.00140873
uncultured_bacterium_f_Acetobacteraceae	0	0	0	0.000239913	6.275e-07	0.000140033	0.000999001	0.00140873
Tannerella	0.000354429	4.20998e-07	0.0001147	2.24472e-05	4.82651e-09	1.22812e-05	0.000999001	0.00140873
Porphyrobacter	0	0	0	0.000313119	5.58253e-07	0.000132081	0.000999001	0.00140873
Slackia	8.20449e-06	1.53675e-09	6.9299e-06	0.00243233	7.78992e-05	0.00156024	0.000999001	0.00140873
Shuttleworthia	0	0	0	0.00113819	6.73891e-06	0.000458902	0.000999001	0.00140873
Lachnoanaerobaculum	0.00178829	5.82205e-06	0.000426543	0.0123817	0.000159582	0.00223315	0.000999001	0.00140873
Proteiniclasticum	0	0	0	0.000950432	1.36206e-05	0.000652414	0.000999001	0.00140873
uncultured_bacterium_f_Kineosporiaceae	0	0	0	0.000157195	1.9394e-07	7.785e-05	0.000999001	0.00140873
Pseudarthrobacter	6.83807e-06	1.4963e-09	6.83807e-06	0.00309834	3.29855e-05	0.00101528	0.000999001	0.00140873
Pseudolabrys	0	0	0	0.00104094	2.72056e-06	0.000291577	0.000999001	0.00140873
Pseudomonas	0.249106	0.0967795	0.0549942	5.3203e-05	9.87534e-09	1.75671e-05	0.000999001	0.00140873
Pseudonocardia	0	0	0	0.00048757	1.54584e-06	0.000219789	0.000999001	0.00140873
Pseudopropionibacterium	0	0	0	0.000523837	2.18164e-06	0.000261106	0.000999001	0.00140873
Pyramidobacter	0	0	0	0.00182293	5.94899e-05	0.00136347	0.000999001	0.00140873
Reyranella	0	0	0	0.000867674	4.49257e-06	0.00037469	0.000999001	0.00140873
Rhodobacter	0	0	0	0.000920456	6.13461e-06	0.000437843	0.000999001	0.00140873
Sinomonas	0	0	0	0.000374852	8.70125e-07	0.000164898	0.000999001	0.00140873
Rhodoplanes	0	0	0	0.00385467	2.94225e-05	0.000958881	0.000999001	0.00140873
Rothia	0.00773806	0.00018301	0.00239146	0.0977097	0.0231965	0.0269238	0.000999001	0.00140873
Rubellimicrobium	0	0	0	0.000229368	8.74111e-07	0.000165275	0.000999001	0.00140873
Ruegeria	0	0	0	0.000675436	1.55982e-06	0.000220782	0.000999001	0.00140873
Sandaracinus	0.00238498	0.00018202	0.00238498	0	0	0	0.000999001	0.00140873
Sarcina	0	0	0	0.00121724	1.38535e-05	0.000657968	0.000999001	0.00140873
Schaalia	0.00676145	7.22314e-05	0.00150241	0.000685929	1.06888e-06	0.000182763	0.000999001	0.00140873
Sedimentibacter	0	0	0	0.000250136	1.826e-06	0.000238878	0.000999001	0.00140873
Selenomonas	0.00866868	0.000183783	0.0023965	0.000334901	1.90239e-07	7.71036e-05	0.000999001	0.00140873
Sellimonas	0	0	0	0.000784641	1.27872e-06	0.0001999	0.000999001	0.00140873
Serratia	0.00590429	0.000313504	0.00313002	8.15691e-06	5.16847e-10	4.01889e-06	0.000999001	0.00140873
Shimia	0	0	0	0.000565857	3.90713e-06	0.000349425	0.000999001	0.00140873
Robinsoniella	0	0	0	0.000910026	1.78944e-06	0.000236474	0.000999001	0.00140873
Prosthecobacter	0.000895169	2.56425e-05	0.000895169	0	0	0	0.000999001	0.00140873
uncultured_bacterium_f_Synergistaceae	0	0	0	0.000677666	4.92764e-06	0.000392414	0.000999001	0.00140873
Jatrophihabitans	1.80198e-06	1.03909e-10	1.80198e-06	0.000517887	2.33873e-06	0.000270343	0.000999001	0.00140873
Brevibacterium	0.00127504	5.09234e-05	0.00126149	0.0108643	0.000248132	0.00278462	0.000999001	0.00140873
Brevundimonas	0	0	0	0.00402634	6.66977e-05	0.00144371	0.000999001	0.00140873
Campylobacter	0.00888042	0.000173141	0.00232608	0.0355578	0.00114489	0.00598145	0.000999001	0.00140873
Candidatus_Arthromitus	0	0	0	0.0250412	0.0023264	0.00852642	0.000999001	0.00140873
Candidatus_Gortzia	0.000537097	9.23113e-06	0.000537097	0	0	0	0.000999001	0.00140873
Candidatus_Koribacter	0	0	0	0.00357338	2.56568e-05	0.000895419	0.000999001	0.00140873
Candidatus_Pelagibacter	0	0	0	0.000393572	6.39218e-07	0.000141335	0.000999001	0.00140873
Candidatus_Planktoluna	4.98167e-05	6.16731e-08	4.39008e-05	0	0	0	0.000999001	0.00140873
Candidatus_Saccharimonas	0.00117171	6.54838e-06	0.000452368	0.0190334	0.000610503	0.00436786	0.000999001	0.00140873
Candidatus_Soleaferrea	0	0	0	0.00280991	4.69935e-05	0.00121184	0.000999001	0.00140873
Bradyrhizobium	0	0	0	0.000375077	6.25518e-07	0.000139812	0.000999001	0.00140873
Candidatus_Solibacter	0	0	0	0.00257341	1.4223e-05	0.000666685	0.000999001	0.00140873
Actinoallomurus	0	0	0	0.000311687	7.63967e-07	0.000154512	0.000999001	0.00140873
Catonella	0.000388738	3.8467e-07	0.00010964	0.0148254	0.000529372	0.00406729	0.000999001	0.00140873
Johnsonella	0	0	0	0.000603549	1.38574e-06	0.000208097	0.000999001	0.00140873
Cetobacterium	0	0	0	0.00234669	1.38278e-05	0.000657358	0.000999001	0.00140873
Chroococcidiopsis	0	0	0	0.000388641	6.53726e-07	0.00014293	0.000999001	0.00140873
Aeromicrobium	0	0	0	0.000533746	2.2104e-06	0.000262821	0.000999001	0.00140873
Cloacibacillus	0	0	0	0.000771485	4.46724e-06	0.000373632	0.000999001	0.00140873
Clostridioides	0	0	0	0.000521184	1.66355e-06	0.000228004	0.000999001	0.00140873
Clostridium	0.00197274	4.15678e-05	0.00113973	0.0239896	0.00108735	0.00582921	0.000999001	0.00140873
Collinsella	0	0	0	0.00418449	3.38637e-05	0.00102871	0.000999001	0.00140873
Capnocytophaga	0.00720936	0.000139731	0.00208964	3.66057e-05	9.37119e-09	1.71129e-05	0.000999001	0.00140873
Coprococcus	0	0	0	0.000598558	9.14889e-07	0.000169087	0.000999001	0.00140873
Blautia	0.000138764	4.03117e-07	0.000112238	0.0123461	0.000172598	0.00232243	0.000999001	0.00140873
Bellilinea	0	0	0	0.000798612	3.24946e-06	0.000318662	0.000999001	0.00140873
Agathobaculum	0	0	0	0.000550423	1.80396e-06	0.000237432	0.000999001	0.00140873
Akkermansia	0.000938803	2.67227e-05	0.000913829	0.0106316	0.000233966	0.00270396	0.000999001	0.00140873
Alcanivorax	0.0022368	3.30607e-05	0.00101644	0	0	0	0.000999001	0.00140873
Aliiroseovarius	0	0	0	0.000256976	1.63813e-07	7.15483e-05	0.000999001	0.00140873
Allobaculum	0	0	0	0.000882277	2.09633e-05	0.000809384	0.000999001	0.00140873
Alloprevotella	0.0118835	0.000357123	0.00334067	0.000292093	9.15234e-08	5.34799e-05	0.000999001	0.00140873
Altererythrobacter	0	0	0	0.000186998	1.77018e-07	7.43761e-05	0.000999001	0.00140873
Aminobacter	0	0	0	0.000908203	3.98678e-06	0.000352969	0.000999001	0.00140873
Actinomyces	0.007079	8.86945e-05	0.00166484	0.000315301	4.31317e-07	0.000116098	0.000999001	0.00140873
Anaerosporobacter	1.06359e-05	1.84969e-09	7.60281e-06	0.000610882	9.52664e-07	0.000172542	0.000999001	0.00140873
Bifidobacterium	0.00202106	4.60078e-05	0.00119906	0.0278643	0.00104484	0.00571412	0.000999001	0.00140873
Actinokineospora	0.000537424	6.14867e-06	0.000438344	0	0	0	0.000999001	0.00140873
Anaerovorax	0	0	0	0.00312817	2.23729e-05	0.000836154	0.000999001	0.00140873
Aquamicrobium	0	0	0	0.000330967	5.58404e-07	0.000132099	0.000999001	0.00140873
Aquirufa	0.00167644	1.88484e-05	0.000767472	0	0	0	0.000999001	0.00140873
Arcobacter	0	0	0	0.000556931	6.93233e-06	0.000465441	0.000999001	0.00140873
Aridibacter	0	0	0	0.0002993	9.47604e-07	0.000172083	0.000999001	0.00140873
Atopobium	0.00230381	2.2025e-05	0.000829628	0.0144041	0.000288389	0.00300203	0.000999001	0.00140873
Azospirillum	0	0	0	0.000627994	2.74368e-06	0.000292814	0.000999001	0.00140873
Bacillus	0.0262083	0.00390897	0.0110524	2.42303e-05	9.122e-09	1.68838e-05	0.000999001	0.00140873
Bdellovibrio	0.000447785	6.41638e-06	0.000447785	0	0	0	0.000999001	0.00140873
Beijerinckia	0	0	0	0.000366676	1.21471e-06	0.000194832	0.000999001	0.00140873
Anaerostipes	0	0	0	0.00155612	1.26466e-05	0.000628654	0.000999001	0.00140873
Corynebacterium	0.00285386	3.4113e-05	0.00103249	0.0195686	0.00276936	0.00930282	0.000999001	0.00140873
Citricoccus	0	0	0	0.000328753	8.57736e-07	0.00016372	0.000999001	0.00140873
Cupriavidus	0.00316543	3.0302e-05	0.000973108	0	0	0	0.000999001	0.00140873
Acetobacter	0	0	0	0.00138689	1.37603e-05	0.00065575	0.000999001	0.00140873
Filifactor	0.000218716	1.46153e-06	0.000213712	0.0141591	0.000345538	0.00328604	0.000999001	0.00140873
Cryptobacterium	0	0	0	0.00039375	2.41285e-06	0.000274594	0.000999001	0.00140873
Flavobacterium	0.00566142	0.000397976	0.00352658	0	0	0	0.000999001	0.00140873
Flavonifractor	5.15975e-05	8.51935e-08	5.15975e-05	0.0024427	1.52258e-05	0.000689787	0.000999001	0.00140873
Fretibacterium	0.000427848	1.49539e-06	0.000216173	0.00522863	9.94468e-05	0.00176287	0.000999001	0.00140873
Fusicatenibacter	0	0	0	0.00341757	2.83187e-05	0.000940723	0.000999001	0.00140873
Fusobacterium	0.0267162	0.00128431	0.00633519	0.143967	0.0132652	0.0203602	0.000999001	0.00140873
Gaiella	0.00181468	0.000105378	0.00181468	0	0	0	0.000999001	0.00140873
Gardnerella	0	0	0	0.000722384	2.54528e-06	0.000282028	0.000999001	0.00140873
Gemella	0.00606596	0.000133115	0.00203957	0.00036467	5.14806e-07	0.000126837	0.000999001	0.00140873
Gemmobacter	0	0	0	0.000685151	6.79146e-07	0.000145682	0.000999001	0.00140873
Faecalicatena	0	0	0	0.00288363	1.4733e-05	0.000678532	0.000999001	0.00140873
Gluconobacter	0	0	0	0.000248609	1.88752e-06	0.000242868	0.000999001	0.00140873
Granulicatella	0.00269726	2.76575e-05	0.000929676	0.000314438	1.79909e-07	7.4981e-05	0.000999001	0.00140873
Granulicella	0	0	0	0.000350997	4.61413e-07	0.00012008	0.000999001	0.00140873
Haemophilus	0.0283939	0.00141104	0.00664041	0.000812628	7.14172e-07	0.000149392	0.000999001	0.00140873
Halarcobacter	0	0	0	0.000808451	3.73785e-06	0.000341772	0.000999001	0.00140873
Harryflintia	0	0	0	0.000356163	6.42451e-07	0.000141692	0.000999001	0.00140873
Helicobacter	0	0	0	0.00426534	3.52131e-05	0.001049	0.000999001	0.00140873
Hirschia	0	0	0	0.000421774	2.09962e-06	0.000256151	0.000999001	0.00140873
Hungatella	4.90247e-06	7.69096e-10	4.90247e-06	0.00397307	3.00915e-05	0.000969722	0.000999001	0.00140873
Hyphomicrobium	0	0	0	0.00131902	6.13252e-06	0.000437768	0.000999001	0.00140873
Ilumatobacter	0	0	0	0.000371321	2.53467e-06	0.00028144	0.000999001	0.00140873
Intestinimonas	0.000143406	6.58087e-07	0.000143406	0.00502591	9.42208e-05	0.00171593	0.000999001	0.00140873
Janibacter	0	0	0	0.00126976	2.77368e-06	0.00029441	0.000999001	0.00140873
Gordonia	3.41904e-06	3.74074e-10	3.41904e-06	0.00332431	3.20369e-05	0.00100058	0.000999001	0.00140873
Faecalibacterium	0	0	0	0.0138014	0.000269611	0.00290264	0.000999001	0.00140873
Adlercreutzia	0	0	0	0.000539452	5.46578e-06	0.000413287	0.000999001	0.00140873
Eubacterium	0.00103479	4.86942e-06	0.000390089	0.0224406	0.000528232	0.00406291	0.000999001	0.00140873
Cutibacterium	0	0	0	0.00293285	1.64211e-05	0.000716351	0.000999001	0.00140873
Defluviitalea	0	0	0	0.000700205	1.94268e-06	0.000246392	0.000999001	0.00140873
Desertibacter	0	0	0	0.000247678	3.94222e-07	0.000110993	0.000999001	0.00140873
Desulfovibrio	0	0	0	0.000126167	4.11404e-07	0.000113386	0.000999001	0.00140873
Devosia	0	0	0	0.00149921	5.41177e-06	0.00041124	0.000999001	0.00140873
Dietzia	0	0	0	0.00201683	1.04394e-05	0.000571166	0.000999001	0.00140873
Dongia	0	0	0	0.00163292	1.85521e-05	0.000761416	0.000999001	0.00140873
Dorea	0	0	0	0.00109826	1.3927e-06	0.000208619	0.000999001	0.00140873
Eggerthella	0	0	0	0.000662449	2.01821e-06	0.000251136	0.000999001	0.00140873
Elusimicrobium	0	0	0	0.000422986	4.25235e-06	0.000364535	0.000999001	0.00140873
Ensifer	0	0	0	0.000745078	1.97419e-06	0.000248381	0.000999001	0.00140873
Aciditerrimonas	0	0	0	0.00130669	8.48767e-06	0.000515014	0.000999001	0.00140873
Enterorhabdus	0	0	0	0.00112351	1.32839e-05	0.000644298	0.000999001	0.00140873
Ethanoligenens	0	0	0	0.000521811	2.4925e-06	0.000279089	0.000999001	0.00140873
Erythrobacter	0	0	0	0.00031938	5.60574e-07	0.000132355	0.000999001	0.00140873
Enteractinococcus	0	0	0	0.000368531	5.50941e-07	0.000131213	0.000999001	0.00140873
Enhydrobacter	9.26234e-06	1.65014e-09	7.181e-06	4.27664e-05	5.85268e-08	4.27664e-05	0.0010956	0.00153786
Paenarthrobacter	2.69862e-05	2.33041e-08	2.69862e-05	0.000546756	1.18234e-06	0.000192219	0.001998	0.002754
Mogibacterium	0.000453177	7.30073e-07	0.000151046	0.00184927	5.11972e-06	0.000399989	0.001998	0.002754
Bosea	2.82014e-05	2.54503e-08	2.82014e-05	0.000584489	1.227e-06	0.000195815	0.001998	0.002754
Porphyromonas	0.00406482	3.40285e-05	0.00103121	0.000809789	7.94311e-07	0.000157551	0.001998	0.002754
Treponema	0.00278764	4.86745e-05	0.00123332	0.000124118	9.08343e-08	5.32782e-05	0.002997	0.00400473
Roseburia	0.00150457	7.21153e-05	0.0015012	0.00870076	0.000182442	0.00238774	0.002997	0.00400473
Solobacterium	0.00138965	5.54903e-06	0.000416422	0.000185049	9.84917e-08	5.54785e-05	0.002997	0.00400473
Rhodococcus	0.000173605	9.15292e-07	0.000169124	0.00144069	4.19433e-06	0.00036204	0.002997	0.00400473
Acinetobacter	0.00522305	0.000326129	0.00319242	5.87596e-05	3.72801e-08	3.41322e-05	0.002997	0.00400473
Salinibacterium	2.67235e-05	1.77725e-08	2.35667e-05	0.00054508	1.37949e-06	0.000207627	0.002997	0.00400473
Chryseobacterium	0.00110211	3.52517e-06	0.000331906	3.92185e-05	6.09911e-09	1.38057e-05	0.002997	0.00400473
Aggregatibacter	0.00215543	2.06121e-05	0.000802576	0.000113189	3.2265e-08	3.17535e-05	0.003996	0.00531642
Acidovorax	4.93584e-05	7.28703e-08	4.772e-05	1.5945e-05	1.12205e-09	5.9215e-06	0.00497568	0.00658824
Romboutsia	0.000930179	2.76875e-05	0.000930179	0.00637268	0.000102753	0.00179194	0.004995	0.00658824
Rhizobium	0.000300875	2.89683e-06	0.000300875	0.00218826	1.17412e-05	0.000605733	0.00599401	0.00787196
Anaeroglobus	4.10393e-05	1.16775e-08	1.9103e-05	2.50368e-05	1.46364e-08	2.13866e-05	0.00637355	0.00833464
Brachybacterium	0.000259848	1.05784e-06	0.000181817	0.00159116	7.17828e-06	0.000473626	0.00799201	0.0104066
Lactobacillus	0.0278366	0.00482093	0.0122741	0.00170088	6.73784e-06	0.000458865	0.010989	0.0142485
Enterobacter	9.17361e-05	1.4335e-07	6.69304e-05	0.000482352	6.29655e-07	0.000140274	0.011988	0.0153487
Bergeyella	0.0006235	2.84408e-06	0.000298123	7.81565e-06	4.8401e-10	3.88913e-06	0.011988	0.0153487
Sneathia	4.39645e-06	6.18522e-10	4.39645e-06	0.00065417	9.81727e-06	0.000553886	0.011988	0.0153487
Pseudoalteromonas	2.05142e-05	1.34667e-08	2.05142e-05	0	0	0	0.012398	0.0158074
Neisseria	0.00732776	0.000122638	0.00195766	0.00228082	1.10259e-05	0.000586992	0.014985	0.0190266
Polaromonas	4.29775e-05	2.35575e-08	2.71325e-05	1.57118e-05	5.55742e-09	1.31784e-05	0.0175956	0.022249
Anaeroplasma	0.00768478	0.000824107	0.00507478	8.61385e-05	1.72068e-07	7.33289e-05	0.01998	0.02516
Cellulomonas	1.36761e-05	5.98519e-09	1.36761e-05	0.000439458	2.8821e-06	0.000300109	0.020979	0.0263098
Cardiobacterium	0.00144062	6.05916e-05	0.00137604	5.33732e-06	9.11583e-10	5.33732e-06	0.021978	0.0274501
Streptomyces	0.000231768	1.71892e-06	0.000231768	0.00094061	1.69824e-06	0.000230369	0.037962	0.0472211
Eikenella	0.000133553	1.04641e-07	5.71841e-05	1.61029e-05	1.33312e-09	6.45446e-06	0.038961	0.0482675
Abiotrophia	8.98856e-05	6.62793e-08	4.55108e-05	7.66263e-06	1.39926e-09	6.61262e-06	0.044955	0.0554687
